# Supplementary material
Source: MDPI journal article supplement (https://www.mdpi.com/2079-6412/13/7/1220)
Supplement: s1 [file s1]

Archive with 2 entries (2 files):
- 3D structure of the coating prepared from the formula C1¿C02%-PC by MicroCT.avi
- coatings-2400875 - SM.pdf
